# Supplementary material for: Geometry of Terminal Internal Carotid Artery Bifurcation May Be Associated With Middle Cerebral Artery Plaque Ulceration: A Three-Dimensional Rotational Angiography Study
Source: PubMed Central journal article supplement — J Stroke. 2024 Aug 30;26(3):446–9. doi: 10.5853/jos.2024.00129 (PMC11471355; doi:10.5853/jos.2024.00129), 2024-08-30
Supplement: jos-2024-00129-Supplementary-Fig-1.pdf [file jos-2024-00129-Supplementary-Fig-1.pdf]

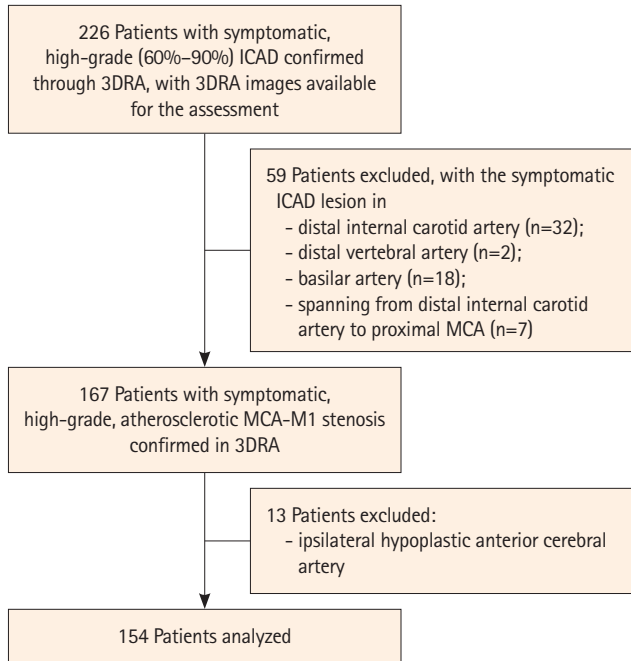

**Supplementary Figure 1.** Flowchart for patient screening. ICAD, intracranial atherosclerotic disease; 3DRA, three-dimensional rotational angiography; MCA, middle cerebral artery.

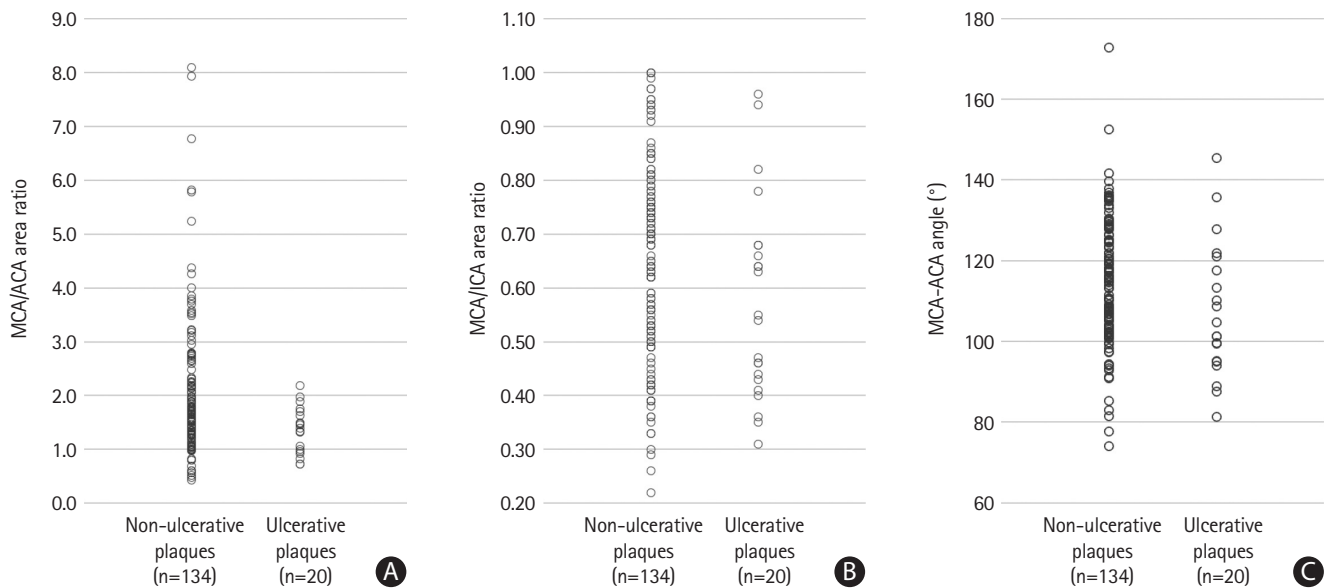

**Supplementary Figure 2.** Scatterplots showing MCA/ACA and MCA/ICA area ratios and MCA-ACA angle in patients with non-ulcerative and ulcerative MCA-M1 plaques. Smaller MCA/ACA (medians 1.36 vs. 1.71;  $P=0.007$ ) and MCA/ICA area ratios (0.51 vs. 0.65;  $P=0.029$ ) and MCA-ACA angle ( $103.1^\circ$  vs.  $113.2^\circ$ ;  $P=0.046$ ) were observed in patients with ulcerative MCA-M1 plaques than in those with non-ulcerative MCA-M1 plaques. MCA, middle cerebral artery; ACA, anterior cerebral artery; ICA, internal carotid artery.
