# Supplementary material for: Geometry of Terminal Internal Carotid Artery Bifurcation May Be Associated With Middle Cerebral Artery Plaque Ulceration: A Three-Dimensional Rotational Angiography Study
Source: PubMed Central journal article supplement — J Stroke. 2024 Aug 30;26(3):446–9. doi: 10.5853/jos.2024.00129 (PMC11471355; doi:10.5853/jos.2024.00129), 2024-08-30
Supplement: jos-2024-00129-Supplementary-Table-1.pdf [file jos-2024-00129-Supplementary-Table-1.pdf]

**Supplementary Table 1.** Demographics, cardiovascular risk factors, and MCA-M1 luminal stenosis in patients with non-ulcerative versus ulcerative MCA-M1 plaques

| Characteristics                               | Overall (n=154) | Non-ulcerative plaques (n=134) | Ulcerative plaques (n=20) | P     |
|-----------------------------------------------|-----------------|--------------------------------|---------------------------|-------|
| Age (yr)                                      | 59 (53–67)      | 60 (53–67)                     | 59 (55–66)                | 0.955 |
| Male sex                                      | 101 (65.6)      | 87 (64.9)                      | 17 (73.9)                 | 0.656 |
| Ever-smoker                                   | 77 (50.0)       | 66 (49.3)                      | 12 (52.2)                 | 0.632 |
| History of dyslipidemia                       | 105 (68.2)      | 94 (70.1)                      | 14 (60.9)                 | 0.175 |
| History of hypertension                       | 89 (57.8)       | 79 (59.0)                      | 12 (52.2)                 | 0.449 |
| History of diabetes                           | 42 (27.3)       | 38 (28.4)                      | 6 (26.1)                  | 0.434 |
| Prior ischemic stroke or TIA                  | 35 (22.7)       | 31 (23.1)                      | 4 (20.0)                  | 0.755 |
| Systolic blood pressure (mm Hg)               | 149 (135–165)   | 150 (135–164)                  | 144 (134–174)             | 0.824 |
| Diastolic blood pressure (mm Hg)              | 82 (74–90)      | 81 (74–90)                     | 84 (64–100)               | 0.665 |
| Laboratory test results                       |                 |                                |                           |       |
| Glycosylated hemoglobin (%)*                  | 6.0 (5.6–6.8)   | 6.0 (5.6–6.7)                  | 6.1 (5.8–6.8)             | 0.417 |
| Fasting blood glucose (mmol/L)*               | 5.5 (5.1–6.7)   | 5.5 (5.0–6.6)                  | 5.9 (5.2–6.8)             | 0.547 |
| Low-density lipoprotein cholesterol (mmol/L)* | 3.3 (2.6–3.9)   | 3.3 (2.5–4.0)                  | 3.4 (2.9–3.9)             | 0.525 |
| High-density lipoprotein cholesterol (mmol/L) | 1.1 (0.9–1.4)   | 1.1 (0.9–1.4)                  | 1.1 (1.0–1.3)             | 0.868 |
| Triglycerides (mmol/L)                        | 1.4 (1.1–1.9)   | 1.4 (1.1–1.9)                  | 1.3 (1.0–1.8)             | 0.599 |
| Percent luminal stenosis in MCA-M1 (%)        | 75 (71–84)      | 75 (71–85)                     | 76 (71–83)                | 0.806 |

Values are medians (interquartile range) or numbers (%); Wilcoxon rank sum tests were used for comparison of continuous variables and chi-square or Fisher's exact tests for categorical variables.

MCA, middle cerebral artery; TIA, transient ischemic attack.

\*Data were missing in 5, 1, and 1 cases for glycosylated hemoglobin, fasting blood glucose, and low-density lipoprotein cholesterol, respectively.

**Supplementary Table 2.** Geometric characteristics at terminal ICA bifurcation in patients with non-ulcerative versus ulcerative MCA-M1 plaques

| Geometric features                                                           | Non-ulcerative plaques (n=134) | Ulcerative plaques (n=20) | P     |
|------------------------------------------------------------------------------|--------------------------------|---------------------------|-------|
| Diameter of MCA origin (mm)                                                  | 2.6 (2.3–2.9)                  | 2.5 (2.0–2.6)             | 0.075 |
| Diameter of ACA origin (mm)                                                  | 2.0 (1.7–2.3)                  | 2.1 (1.8–2.3)             | 0.246 |
| Diameter of terminal ICA (mm)                                                | 3.3 (2.9–3.7)                  | 3.3 (3.0–3.6)             | 0.823 |
| MCA/ACA area ratio                                                           | 1.71 (1.29–2.51)               | 1.36 (0.97–1.68)          | 0.007 |
| MCA/ICA area ratio                                                           | 0.65 (0.51–0.75)               | 0.51 (0.42–0.68)          | 0.029 |
| (MCA+ACA)/ICA area ratio                                                     | 1.03 (0.87–1.16)               | 0.94 (0.82–1.09)          | 0.226 |
| MCA-ACA angle (°)                                                            | 113.2 (103.6–125.0)            | 103.1 (95.1–120.3)        | 0.046 |
| Distance between the starting point of MCA-M1 plaque and the MCA origin (mm) | 4.7 (0–8.7)                    | 4.4 (0.2–6.3)             | 0.871 |

Values are medians (interquartile range); Wilcoxon rank sum tests were used for all comparisons in the table.

ICA, internal carotid artery; MCA, middle cerebral artery; ACA, anterior cerebral artery.
